# Supplementary material for: A novel hydrogenated boron–carbon monolayer with high stability and promising carrier mobility
Source: Royal Society of Chemistry journal article supplement (doi:10.1039/c8cp06346j), 2019-01-01
Supplement: c8cp06346j1.pdf [file c8cp06346j1.pdf]

*Supporting Information for:*

**Novel hydrogenated boron-carbon monolayer  
with high stability and promising carrier  
mobility**

Dong Fan, Shaohua Lu, Chengke Chen, Meiyang Jiang, Xiao Li, and Xiaojun Hu\*

*College of Materials Science and Engineering, Zhejiang University of Technology, Hangzhou*

*310014, China*

**Table S1** | Calculated lattice parameters, elastic constants, in-plane Young's modulus and Poisson's ratio of graphene at GGA-PBE level.

| Phase                                        | Lattice Parameters(Å)                                | C <sub>11</sub> /GPa | C <sub>22</sub> /GPa | C <sub>12</sub> /GPa | C <sub>66</sub> /GPa | In-plane stiffness /GPa·nm                                     | Poisson's ratio                        |
|----------------------------------------------|------------------------------------------------------|----------------------|----------------------|----------------------|----------------------|----------------------------------------------------------------|----------------------------------------|
| <b>Graphene</b>                              | <b>a=b</b> =2.47<br>α =β=90° γ = 120°                | 358                  | 358                  | 65                   | 147                  | 346.73                                                         | 0.18                                   |
| <b>Borophene</b> <sup>*1</sup>               | <b>a</b> = 5.004 <b>b</b> = 2.889<br>α = β = γ = 90° | 398                  | 170                  | -7                   | 94                   | 398( <b>a</b> ) <sup>*3</sup><br>170( <b>b</b> ) <sup>*3</sup> | -0.04( <b>a</b> )<br>-0.02( <b>b</b> ) |
| <b>B<sub>2</sub>C Graphene</b> <sup>*2</sup> | <b>a</b> = 2.558 <b>b</b> = 3.453<br>α = β = γ = 90° | 642.8                | 533.7                | 79.0                 | 230.6                | 524.0                                                          | 0.12                                   |
| <b>h-BCH</b>                                 | <b>a=b</b> =2.624<br>α =β=90° γ = 120°               | 228.2                | 228.2                | 35.4                 | 96.6                 | 223                                                            | 0.155                                  |
| <b>t-BCH</b>                                 | <b>a = b</b> = 2.841<br>α = β = γ = 90°              | 233.9                | 233.9                | 17.8                 | 35.5                 | 233                                                            | 0.076                                  |

\*For *h*-BCH, we use its orthorhombic lattice to calculate the elastic constants.

\*The in-plane Young's modulus and Poisson's ratio can be derived the elastic constants by:

$$E_a = \frac{C_{11}C_{22}-C_{12}C_{21}}{C_{22}} \quad E_b = \frac{C_{11}C_{22}-C_{12}C_{21}}{C_{11}}$$

$$\nu_a = \frac{C_{21}}{C_{22}} \quad \nu_b = \frac{C_{12}}{C_{11}}$$

\*1: Mannix, A. J., et al. *Science* 350.6267(2015):1513-1516.

\*2: Calculated by equations in Ref: Wu, X., Pei, Y., & Zeng, X. C. (2009). *Nano letters*, 9(4), 1577-1582

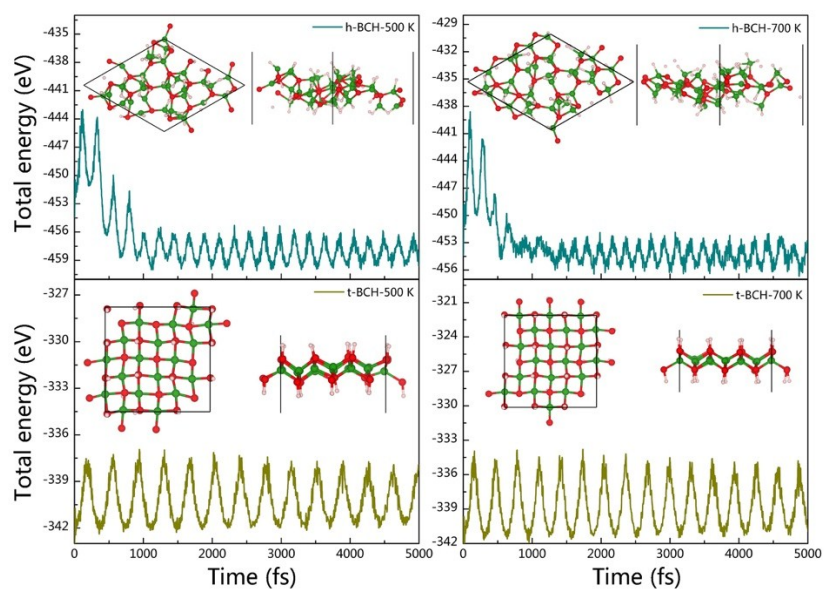

**Fig. S1** | Evolution of total energy of *h*-BCH and *t*-BCH from AIMD simulations at 500 and 700 K. Snapshots at the corresponding temperatures at the end of 5 ps AIMD simulations are also inserted.

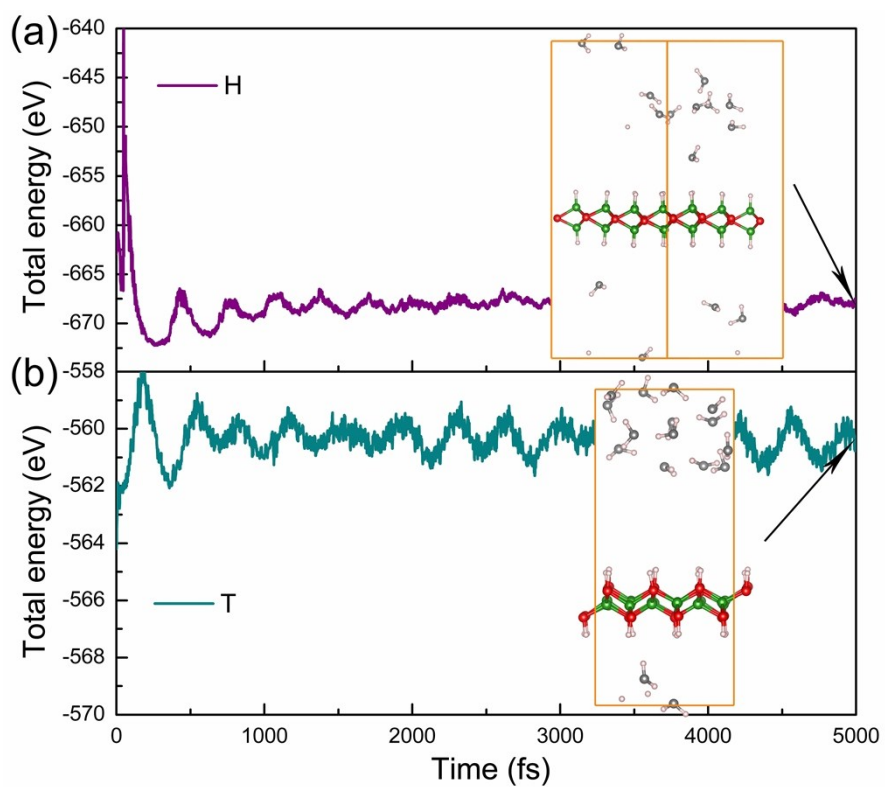

**Fig. S2** | Evolution of total energy and snapshots of (a) *h*-BCH and (b) *t*-BCH with the interaction of low-density water molecule from AIMD simulations at 300 K.

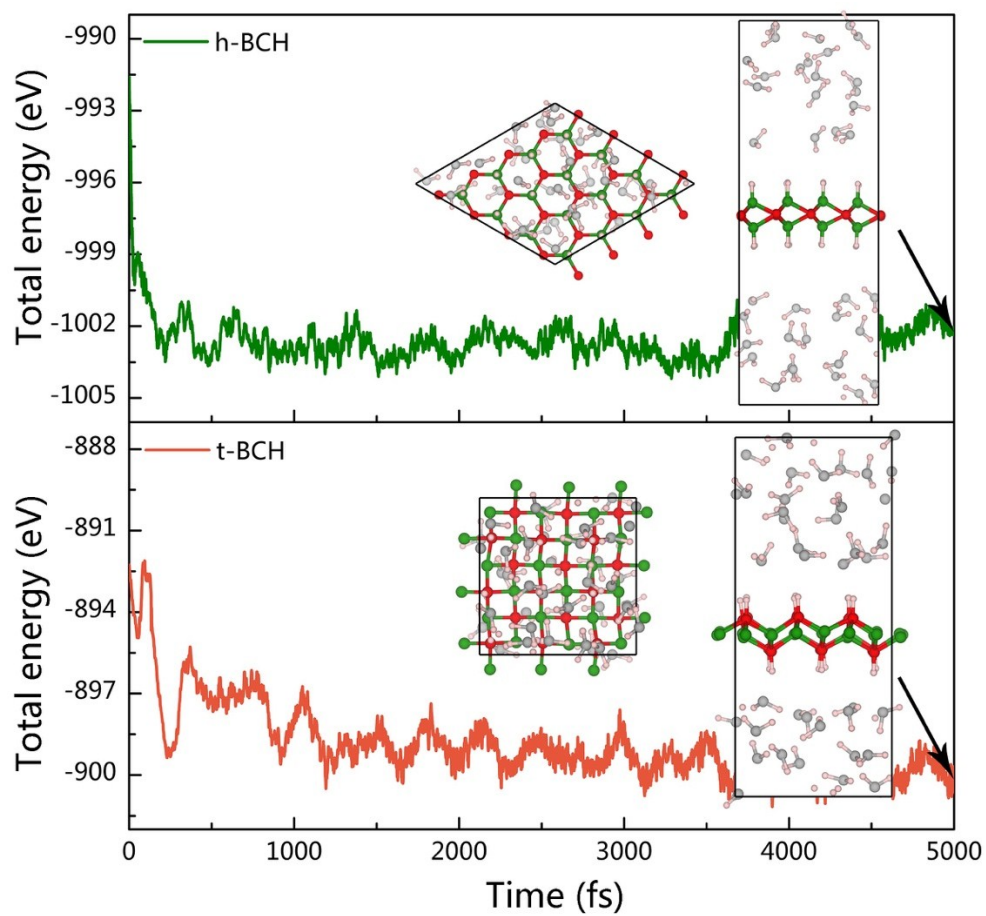

**Fig. S3** | Evolution of total energy and snapshots of  $h(t)$ -BCH with the interaction of high-density water molecule from AIMD simulations at 300 K.

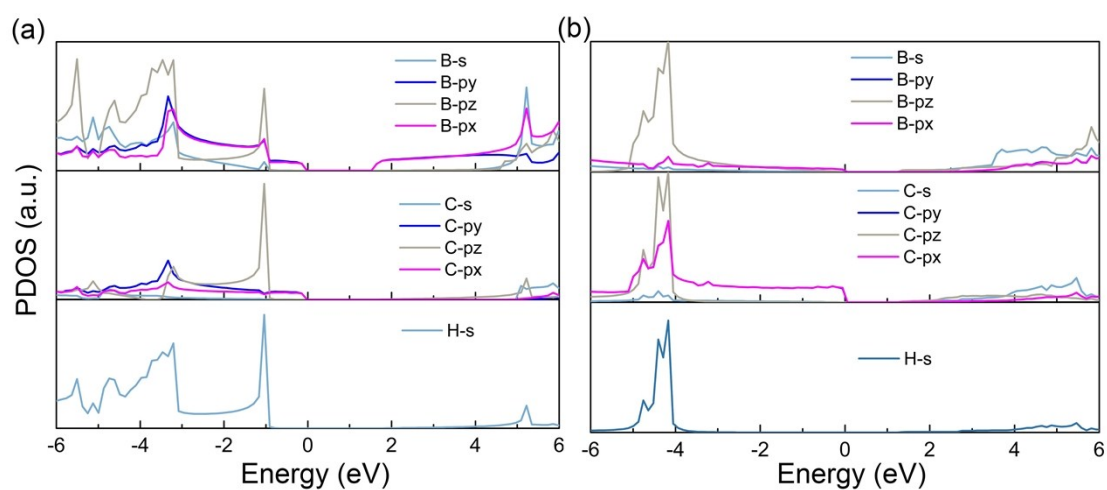

**Fig. S4** | Electronic partial density of states (PDOS) of the *h*-BCH (left) and *t*-BCH (right) at the PBE level.

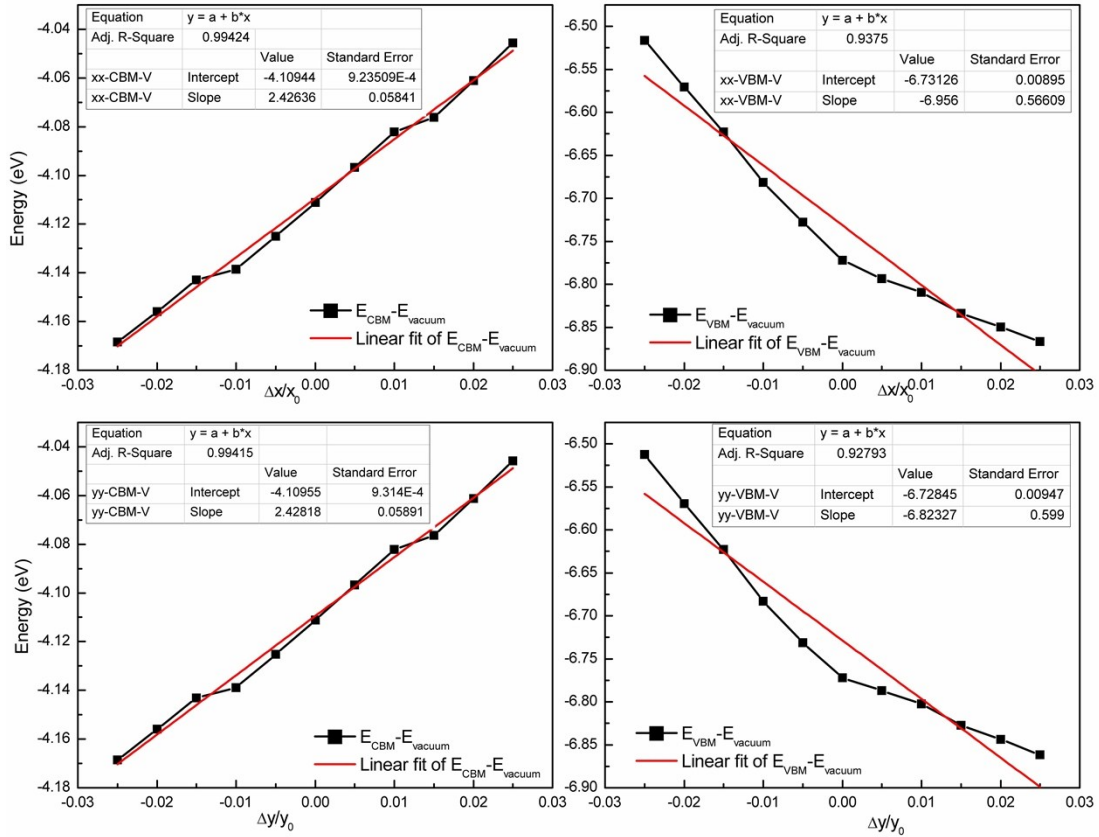

**Fig. S5** | Band energy of the CBM and VBM of *h*-BCH. Band energies were calculated with the HSE06 functional. Red solid lines are the fitting curves. Insets show the standard errors of the fitted slope, which corresponds to the deformation potential.

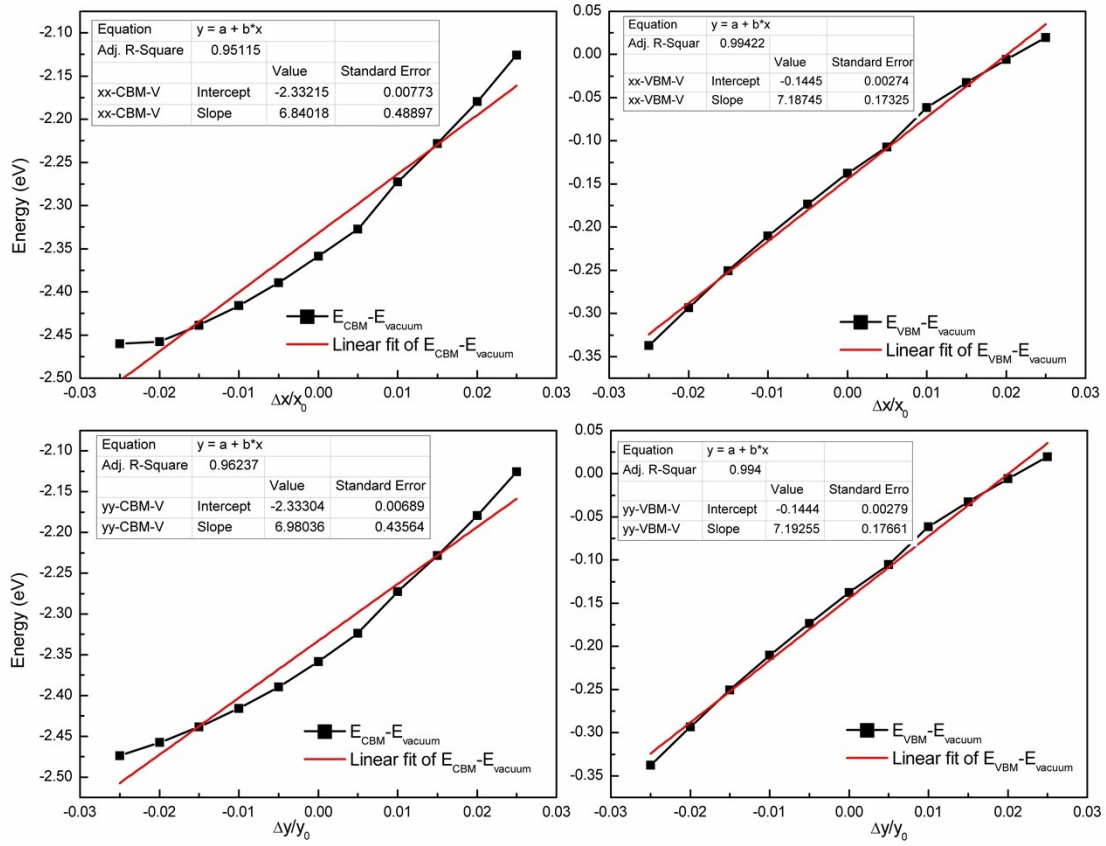

**Fig. S6** | Band energy of the CBM and VBM of *t*-BCH. Band energies were calculated with the HSE06 functional. Red solid lines are the fitting curves. Insets show the standard errors of the fitted slope, which corresponds to the deformation potential.
